# Supplementary material
Source: PubMed Central journal article supplement (PMC6026845)
Supplement: jp8b02926_si_001.pdf [file jp8b02926_si_001.pdf]

# Binding of Divalent Metal Ions with Deprotonated Peptides: Do Gas-Phase Anions Parallel the Condensed Phase?

**Robert C. Dunbar<sup>a</sup>, Jonathan Martens<sup>b</sup>, Giel Berden<sup>b</sup>, Jos Oomens<sup>b,c</sup>**

<sup>a</sup>Chemistry Department, Case Western Reserve University, Cleveland, Ohio 44106

<sup>b</sup>Radboud University, Institute for Molecules and Materials, FELIX Laboratory,

Toernooiveld 7c, 6525ED Nijmegen, The Netherlands, e-mail: [joso@science.ru.nl](mailto:joso@science.ru.nl)

<sup>c</sup>University of Amsterdam, Science Park 904, 1098XH Amsterdam, The Netherlands

## Supplementary Material.

### Contents:

- I. Structures and energies of complexes
- II. Computed spectra and fits to experiment
- III. Complete Ref. 43

## I. Structures and Energies of Complexes

Energies (kJ/mol) are relative to the lowest-energy complex of the given metal and isomer. Values in parentheses are free energies (harmonic vibrations, free rotors) at 300 K.

| Peptide / conformer | Ni <sup>2+</sup> | Cu <sup>2+</sup> |
|---------------------|------------------|------------------|
| <b>AAH</b>          |                  |                  |
| Im2[NNON]a          | 0 (0)            | 0 (0)            |
| Im2[NNON]b          | 2 (2)            | 3 (4)            |
| Im2[NNNR]           | 26 (29)          | 13 (12)          |
| Im2[NNON(R)]        |                  | 56 (52)          |
| Im1CS1[NOOR]        |                  | 159 (153)        |
| <b>AHA</b>          |                  |                  |
| Im2[NNON]a          | 0 (0)            | 0 (1)            |
| Im2[NNON]b          | 5 (5)            | 2 (0)            |
| Im2[NNON(R)]        | 56 (46)          | 73 (69)          |
| Im1CS1[NOOR]        | 74 (70)          | 83 (83)          |
| <b>HAA</b>          |                  |                  |
| Im2[NNON]a          | 0 (0)            | 0 (0)            |
| Im2[NNON]b          | 2 (2)            | 31 (28)          |
| Im2[NNOR]           | 59 (59)          | 36 (39)          |
| Im1CS1[NOOR]        | 109 (102)        | 60 (68)          |
| Im2[NNON(R)]        | 114 (98)         | *                |

\* Rearranges to Im2[NNON]b

**Fig. S1.** Computed structures for complexes of  $\text{Cu}^{2+}$  and  $\text{Ni}^{2+}$  with AlaAlaHis with an overall  $-1$  charge (ligand triply deprotonated). Relative energies are given in kJ/mol with free energies in brackets.

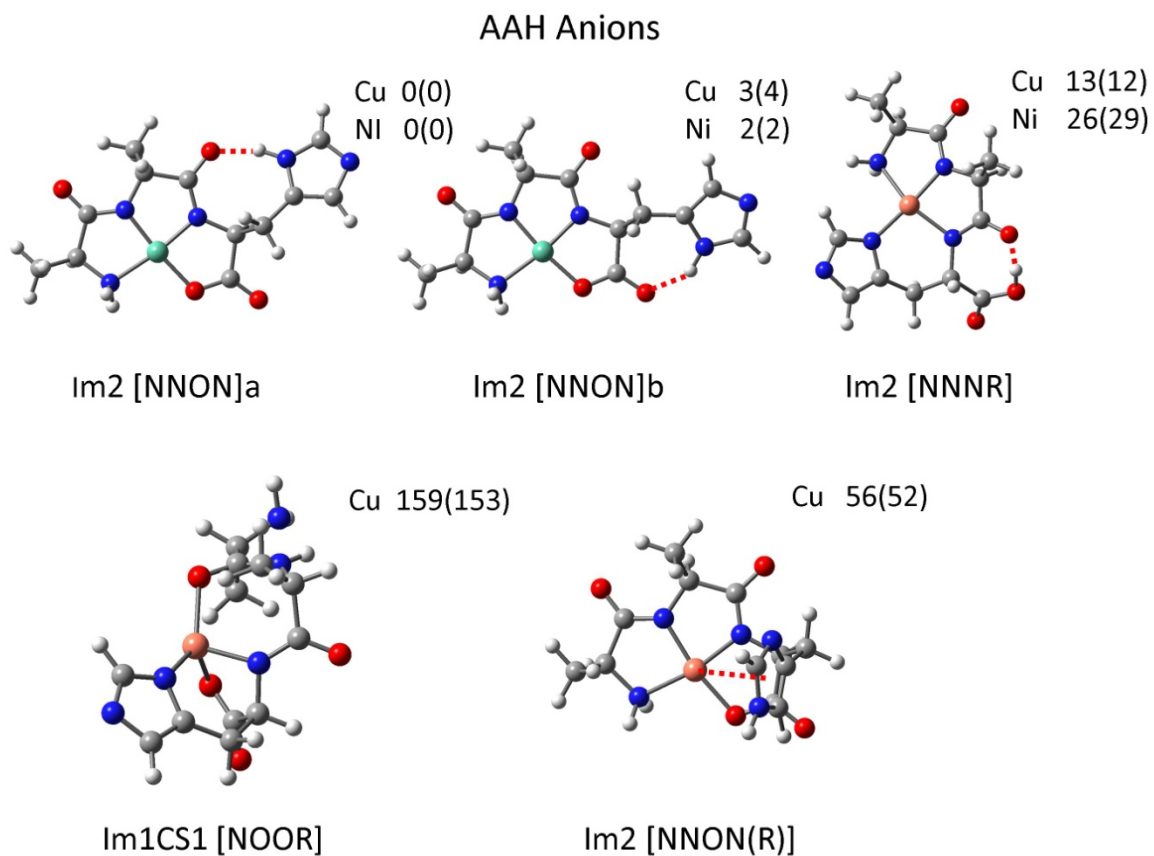

**Fig. S2.** Computed structures for complexes of  $\text{Cu}^{2+}$  and  $\text{Ni}^{2+}$  with AlaHisAla with an overall  $-1$  charge (ligand triply deprotonated). Relative energies are given in kJ/mol with free energies in brackets.

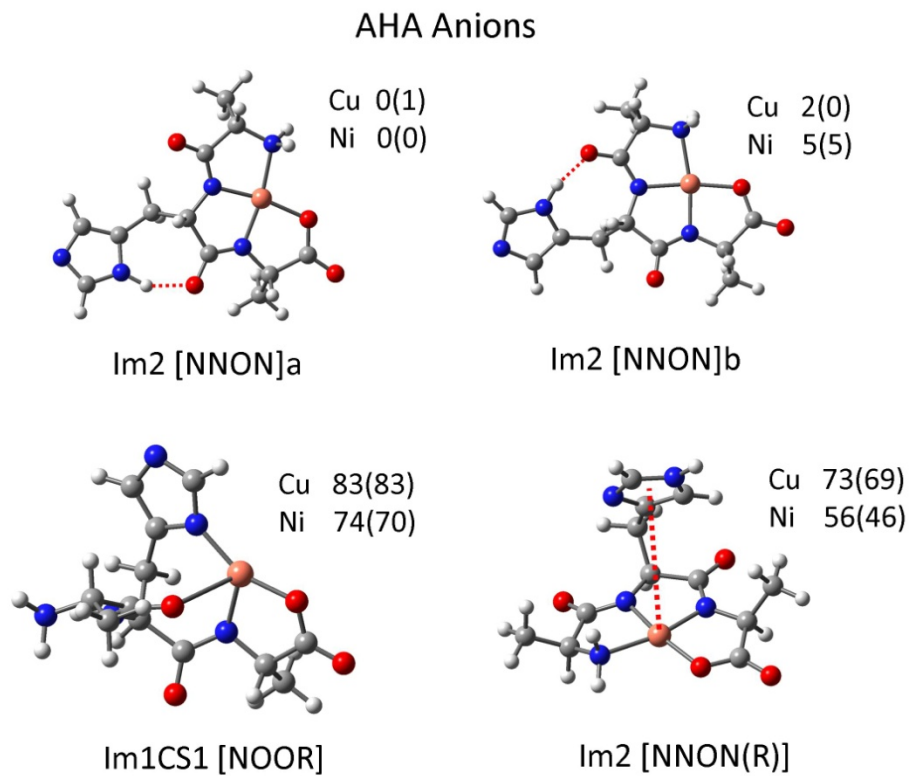

**Fig. S3.** Computed structures for complexes of  $\text{Cu}^{2+}$  and  $\text{Ni}^{2+}$  with HisAlaAla with an overall  $-1$  charge (ligand triply deprotonated). Relative energies are given in kJ/mol with free energies in brackets.

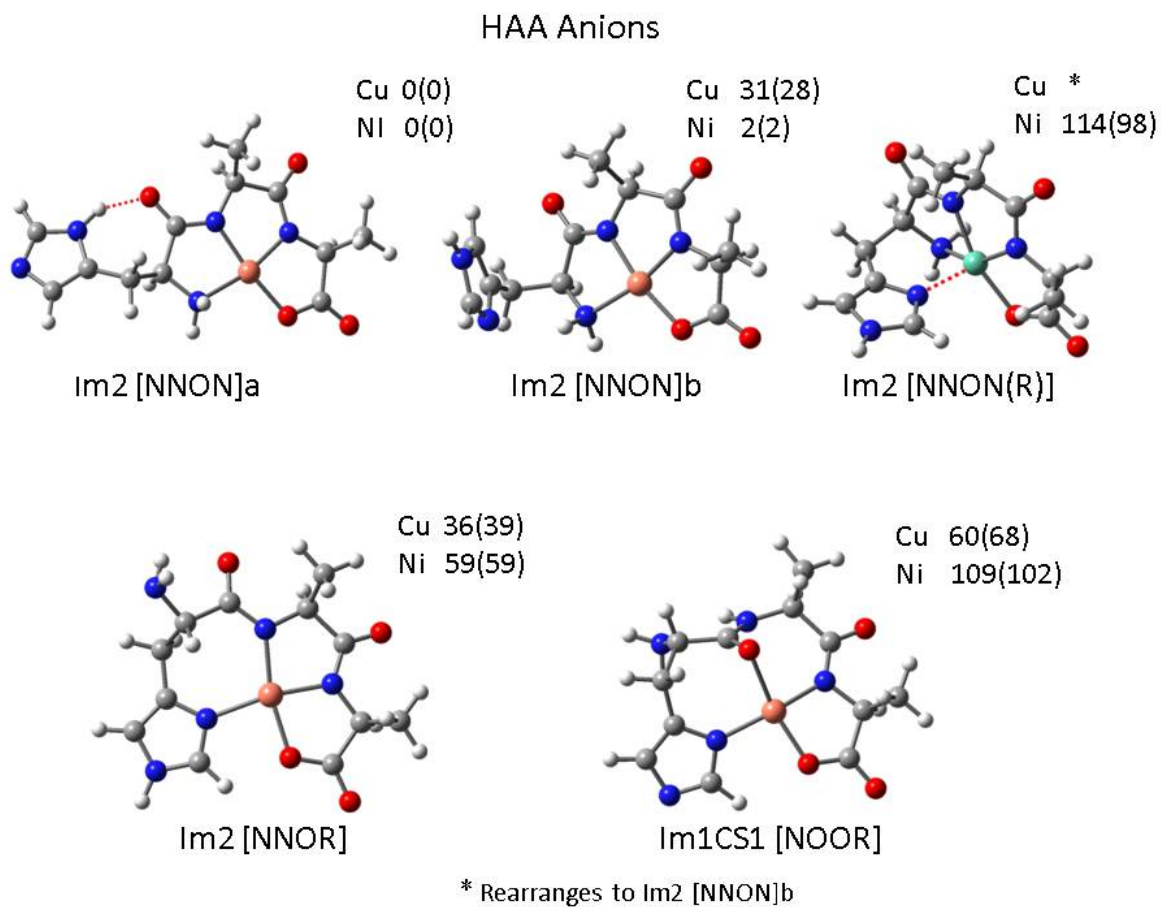

## II. Computed spectra and fits to experiment

**Fig. S4:** IRMPD spectrum of the CuAAH anion compared to computed spectra for different coordination motifs and different conformations of them. The green modeled spectrum in the top panel is a 1:1 average of the two lowest-energy Im2[NNON] structures, with 25% of the spectrum of Im2[NNNR] added. Computed energies in kJ mol<sup>-1</sup> are given.

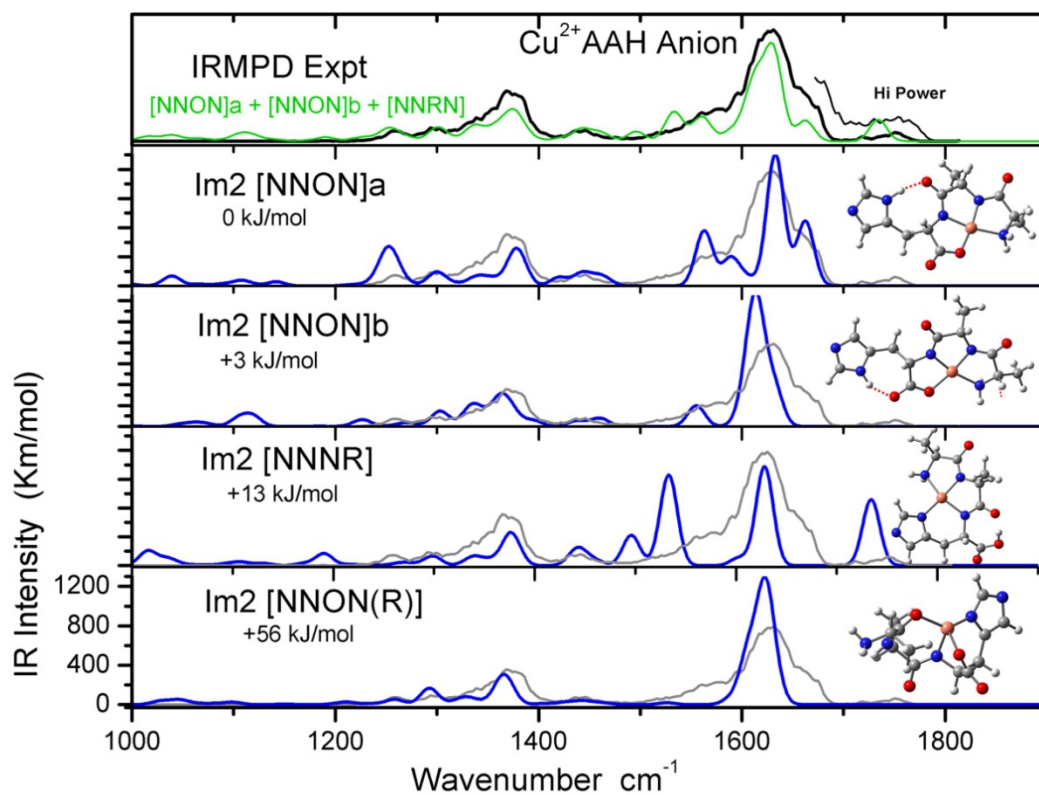

**Fig. S5:** IRMPD spectrum of the NiAAH anion compared to computed spectra for different coordination motifs and different conformations of them. The green modeled spectrum in the top panel is a 1:1 average of the two lowest-energy Im2[NNON] structures, with 25% of the spectrum of Im2[NNNR] added. Computed energies in  $\text{kJ mol}^{-1}$  are given.

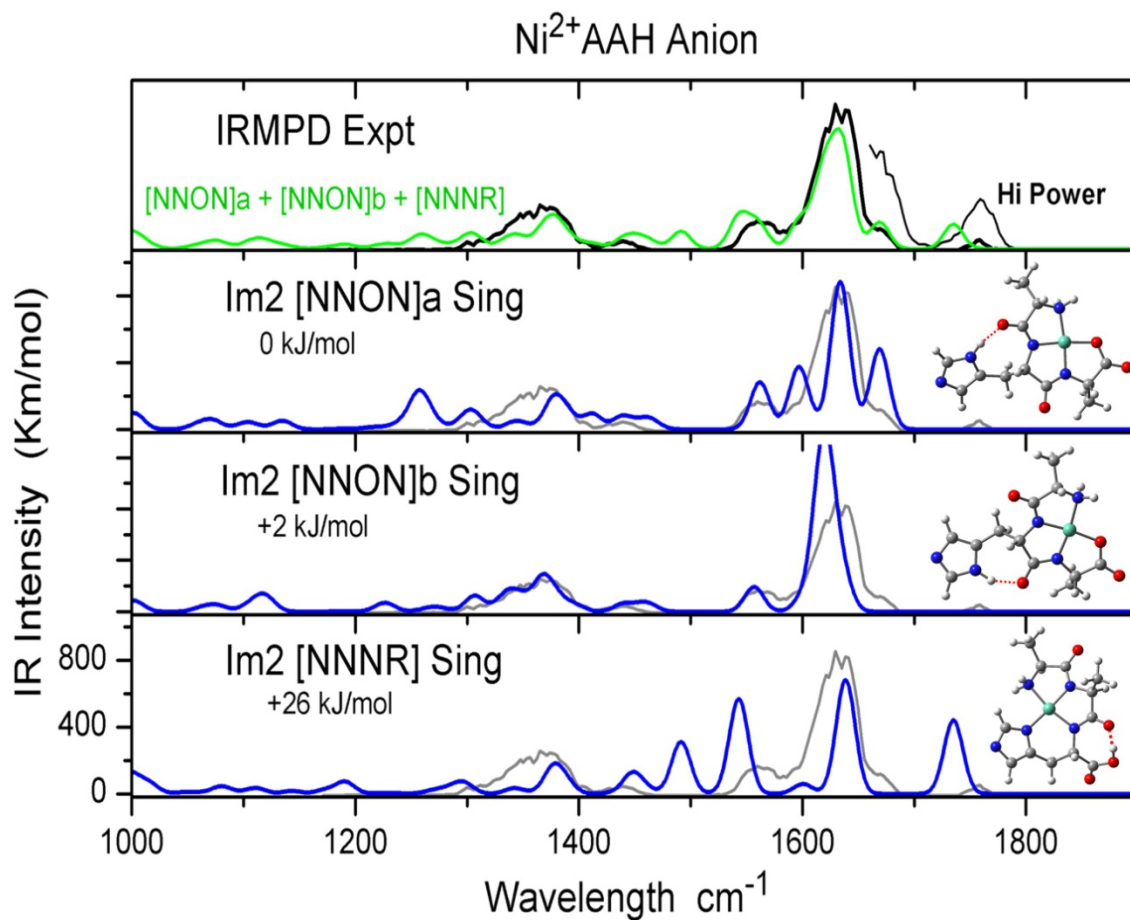

**Fig. S6:** IRMPD spectrum of the CuAHA anion compared to computed spectra for different coordination motifs and different conformations of them. The green modeled spectrum in the top panel is a 1:1 average of the two lowest-energy Im2[NNON] structures. Computed energies in kJ mol<sup>-1</sup> are given.

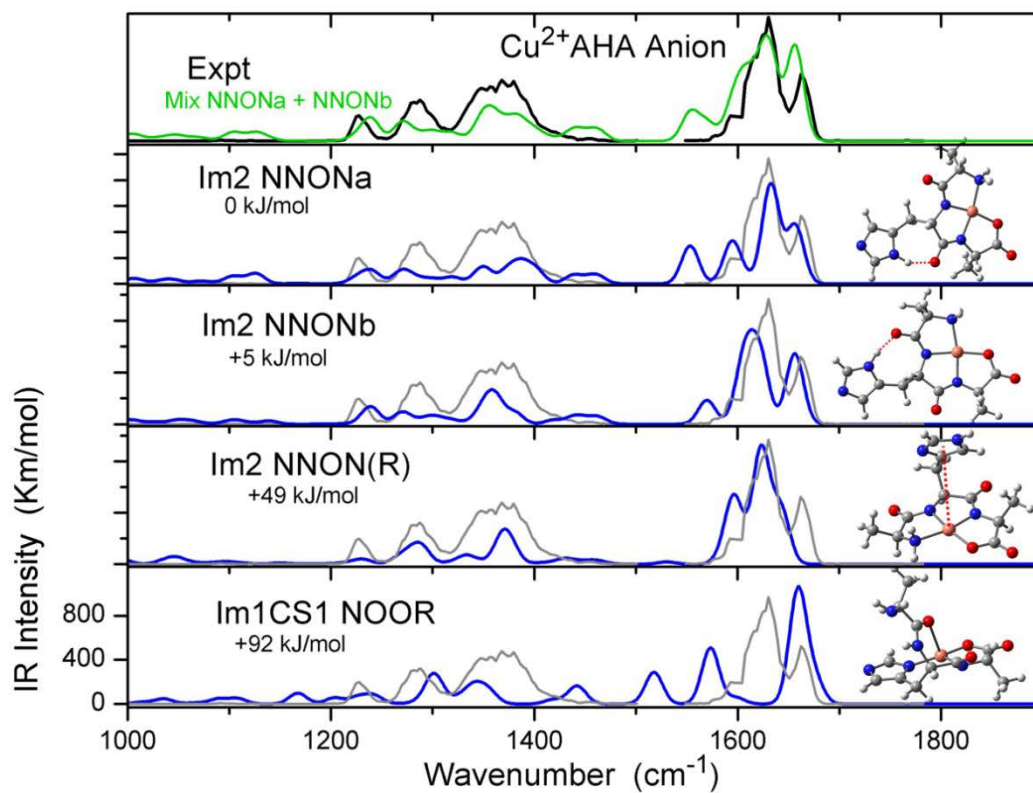



Fig. S7: IRMPD spectrum of the NiAHA anion compared to computed spectra for different coordination motifs and different conformations of them. The green modeled spectrum in the top panel is a 1:1 average of the two lowest-energy Im2[NNON] structures. Computed energies in kJ mol<sup>-1</sup> are given.

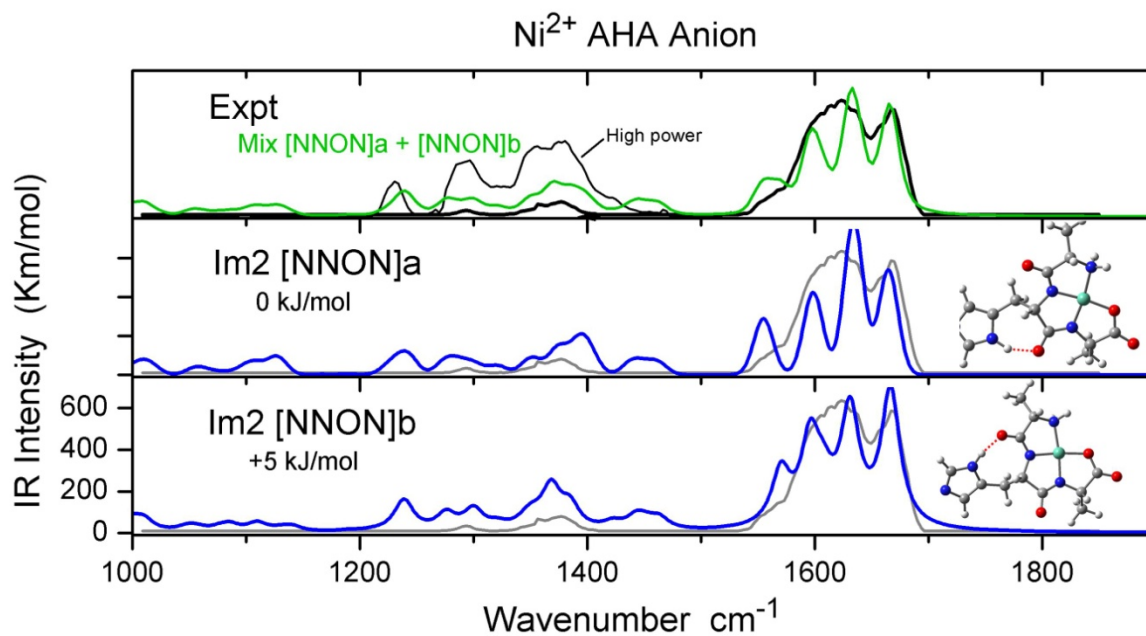

**Fig. S8:** IRMPD spectrum of the CuHAA anion compared to computed spectra for different coordination motifs and different conformations of them. Computed energies in  $\text{kJ mol}^{-1}$  are given.

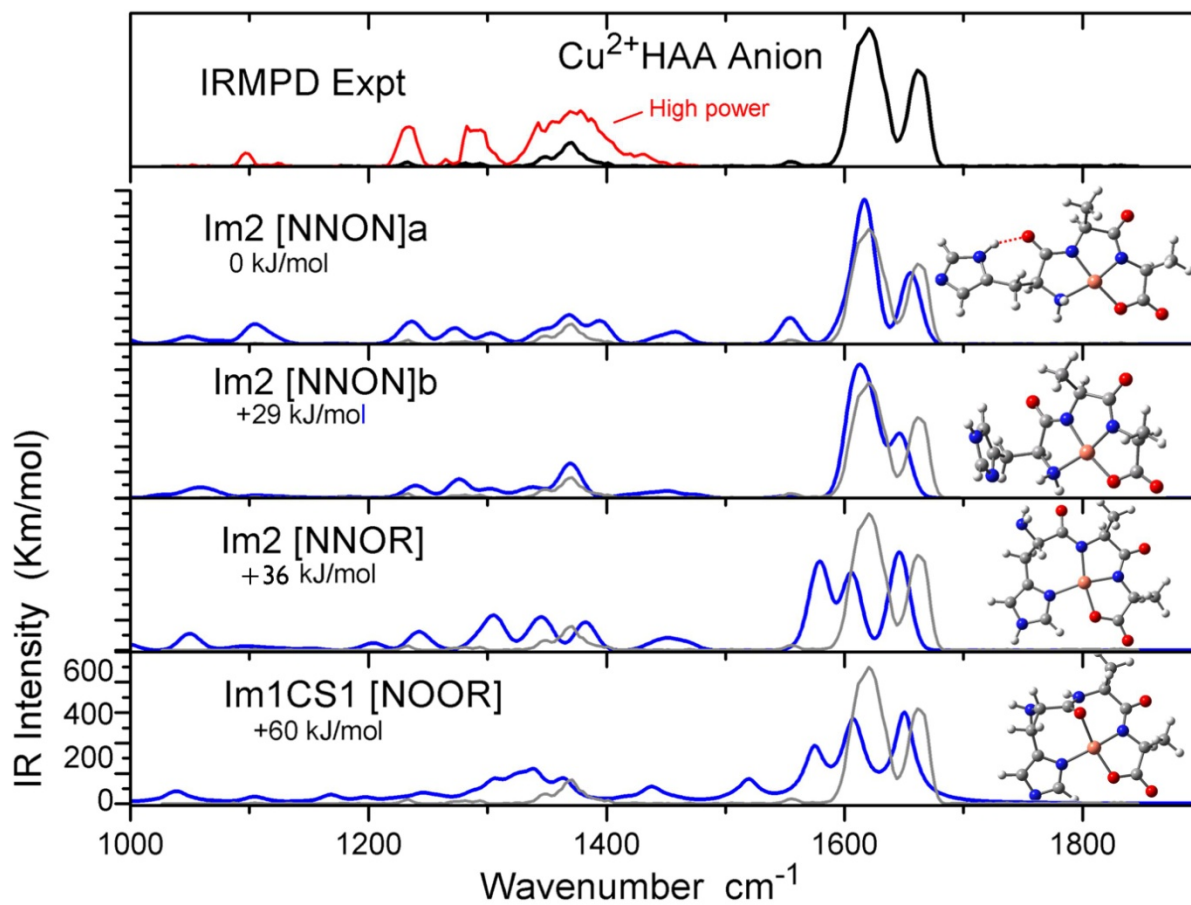

**Fig. S9:** IRMPD spectrum of the NiHAA anion compared to computed spectra for different coordination motifs and different conformations of them. Computed energies in  $\text{kJ mol}^{-1}$  are given.

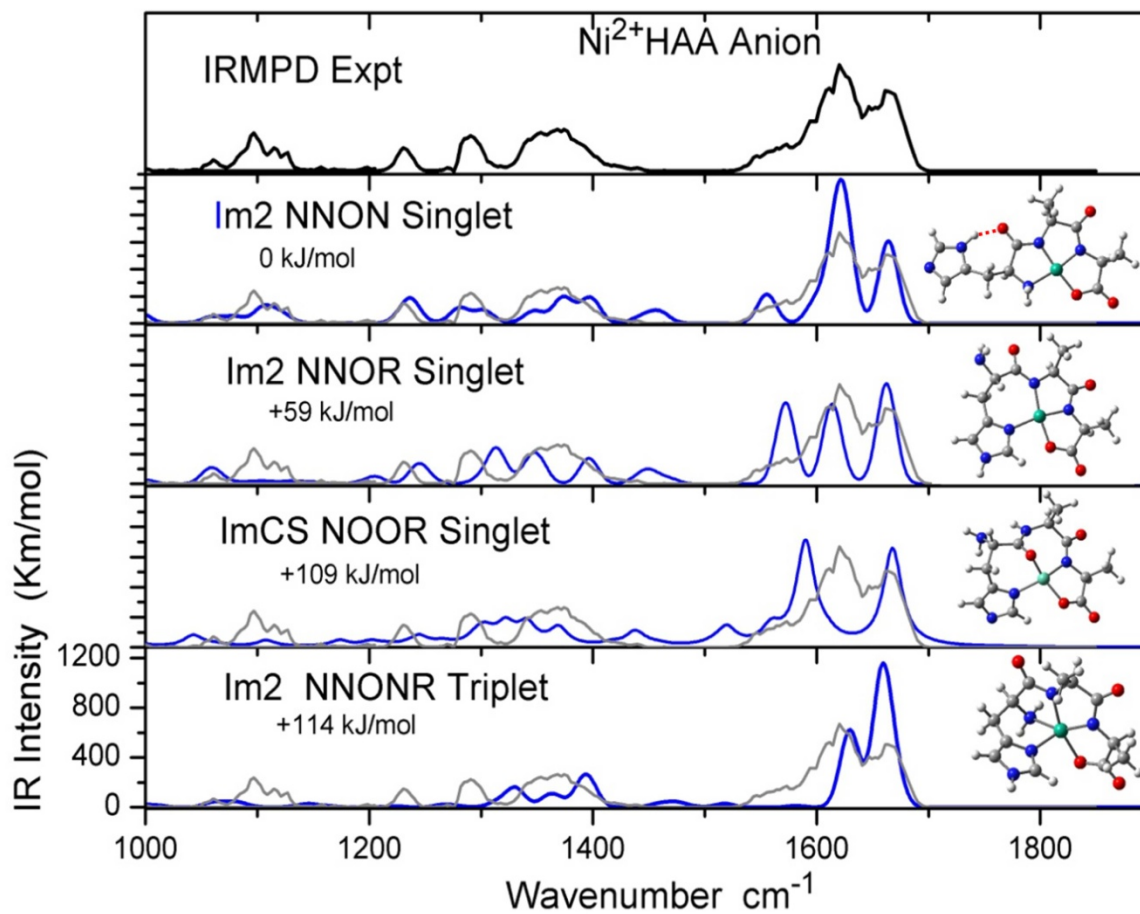

### III. Complete Citation for Reference 43.

Gaussian 09, Revision D.01, M. J. Frisch, G. W. Trucks, H. B. Schlegel, G. E. Scuseria, M. A. Robb, J. R. Cheeseman, G. Scalmani, V. Barone, B. Mennucci, G. A. Petersson, H. Nakatsuji, M. Caricato, X. Li, H. P. Hratchian, A. F. Izmaylov, J. Bloino, G. Zheng, J. L. Sonnenberg, M. Hada, M. Ehara, K. Toyota, R. Fukuda, J. Hasegawa, M. Ishida, T. Nakajima, Y. Honda, O. Kitao, H. Nakai, T. Vreven, J. A. Montgomery, Jr., J. E. Peralta, F. Ogliaro, M. Bearpark, J. J. Heyd, E. Brothers, K. N. Kudin, V. N. Staroverov, R. Kobayashi, J. Normand, K. Raghavachari, A. Rendell, J. C. Burant, S. S. Iyengar, J. Tomasi, M. Cossi, N. Rega, J. M. Millam, M. Klene, J. E. Knox, J. B. Cross, V. Bakken, C. Adamo, J. Jaramillo, R. Gomperts, R. E. Stratmann, O. Yazyev, A. J. Austin, R. Cammi, C. Pomelli, J. W. Ochterski, R. L. Martin, K. Morokuma, V. G. Zakrzewski, G. A. Voth, P. Salvador, J. J. Dannenberg, S. Dapprich, A. D. Daniels, Ö. Farkas, J. B. Foresman, J. V. Ortiz, J. Cioslowski, and D. J. Fox, Gaussian, Inc., Wallingford CT, 2009.
